# Supplementary material for: Are Survey-Based Estimates of the Burden of Drug Resistant TB Too Low? Insight from a Simulation Study
Source: PLoS One. 2008 Jun 4;3(6):e2363. doi: 10.1371/journal.pone.0002363 (PMC2408555; doi:10.1371/journal.pone.0002363)
Supplement: Supplement S1 — (0.03 MB DOC) [file pone.0002363.s001.doc]

**Supplement S1**

***State transitions and probability trees***

At each monthly time step, transitions between health/disease states occur stochastically; state transitions occur with the probabilities listed in Table S1, and the sequence in which the probabilities are considered is depicted in the probability trees in Supplemental Figure 1. Since the two strains of TB in the model differ in transmissibility as well as drug-susceptibility, many parameters are subscripted DS or DR to indicate strain.

The interpretation of the probability trees is shown most simply in the tree of an individual in the IDR state (Fig. S1F). The first branch indicates that each month an IDR individual has a DR probability of recovering from disease and transitioning back to the EDR state, and therefore a probability of not recovering equal to (1- DR). If the IDR individual does not recover, then he has a μDR probability of dying from the infection, and a corresponding (1- μDR) probability of not dying. This means that overall, an IDR individual has a probability of dying each month equal to (1- DR)*μDR, and not simply μDR. If he does not recover or die, a probability of (1- DR)* (1- μDR), then he stays in the IDR state.

The first two branches of the IDS probability tree are analogous to IDR (Fig. S1E). The additional branch at the tip of the tree indicates that the probability of acquiring drug-resistance is equal to (1- DS)* (1- μDS)*α. In others words, if an IDS individual does not recover and does not die, then he has a probability of acquiring drug resistance equal to α. For an IDS individual who is not undergoing treatment, α = 0. With this additional factor, the probability of an IDS individual staying in the same state becomes (1- DS)* (1- μDS)*(1-α).

There are only slight variations in the other probability trees. For instance, the three-pronged branching in the tree for an EDR individual (Fig. S1C) indicates that if such an individual does not die and does not progress, then he has both a probability DS of being infected with drug-sensitive TB and a probability DR of being re-infected with drug-resistant TB. A dotted-line indicates a re-infection event. Together this means that the probability that a EDR individual will remain in the EDR state in a given month is equal to (1- μ)*( 1-DR)*(1- DS - DR).

***Probabilities of progression from latent states***

Previous studies suggest that the risk of progression from latency to disease is highest within five years of an infection or re-infection event. In our model, we specify the per-month probability of progression for those with a recent first infection (p1 primary progression), a recent re-infection (p3 exogenous progression), and a more distant infection or re-infection event (p2 endogenous progression). Additional complexity arises because individuals can be infected with DS or DR strains (EDS, EDR) or both strains (EM), so that we must index both the timing and the phenotype of infection events. The progression rates arising from latency, and their relation to the timing of infection events, are depicted in Figure S2.

**Supplementary Material References**

1. Rutledge C, Crouch J (1919) The ultimate results in 1,654 cases of tuberculosis treated at the Modern Woodmen of America Sanatorium. Am Rev of Tuberc. 2: 755-6.

2. Blower SM, Gerberding JL (1998) Understanding, predicting and controlling the emergence of drug-resistant tuberculosis: a theoretical framework. J Mol Med. 76: 624-636.

3. Dye C, Williams BG (2000) Criteria for the control of drug-resistant tuberculosis. Proc Natl Acad Sci U S A. 97: 8180-8185

4. Cohen T, Murray M (2004) Modeling epidemics of multidrug-resistant M. tuberculosis of heterogeneous fitness. Nat Med. 10:1117-1121.

5. Gagneux S, Burgos MV, DeRiemer K, Enciso A, Muñoz S, et al. (2006) Impact of bacterial genetics on the transmission of isoniazid-resistant Mycobacterium tuberculosis. PLoS Pathog. 2: e61.

6. Gagneux S, Long CD, Small PM, Van T, Schoolnik GK, Bohannan BJM (2006) The competitive cost of antibiotic resistance in Mycobacterium tuberculosis. Science. 312: 1944-1946.

7. Vynnycky E, Fine PE (1997) The natural history of tuberculosis: the implications of age-dependent risks of disease and the role of reinfection. Epidemiol Infect. 119: 183-201.

8. Dye C, Garnett GP, Sleeman K, Williams BG (1998) Prospects for worldwide tuberculosis control under the WHO DOTS strategy. Lancet. 352: 1886-1891.

9. Springett VH (1971) Ten-year results during the introduction of chemotherapy for tuberculosis. Tubercle. 52: 73-­87.

10. Enarson D, Rouillon A (1994) The epidemiological basis of tuberculosis control. In: Davies P, editors. Clinical tuberculosis. London: Chapman and Hall. pp. 19-32.
