# Supplementary material for: Are Survey-Based Estimates of the Burden of Drug Resistant TB Too Low? Insight from a Simulation Study
Source: PLoS One. 2008 Jun 4;3(6):e2363. doi: 10.1371/journal.pone.0002363 (PMC2408555; doi:10.1371/journal.pone.0002363)
Supplement: Table S1 — (0.05 MB DOC) [file pone.0002363.s002.doc]

**Table S1**. Parameters for surveillance model

| **Parameter** | | **Definition** | **Value†** | | **Notes** | | **Source** |
| --- | --- | --- | --- | --- | --- | --- | --- |
| **Birth and death** | | | | | | | |
| **μ** |  | mortality for non-infectious individuals per year | 0.02 | |  | |  |
| **μDS** |  | mortality for untreated IDS individuals per year | 0.25 | |  | | 1 |
| **μDR** |  | mortality for untreated IDR individuals per year | 0.25 | | Assumed to be similar to mortality for IDS | | 1 |
| **γ** |  | birth rate per unoccupied vertex per year | 0.2 | | Fit to maintain stable population size | |  |
| **Infection** | | | | | | | |
| **DS** |  | rate at which non-infectious individuals are infected with the DS strain per year | | [kDS/( kDS+ kDR)] * 1~DS)(~DR)] | | Function of kDS (number of IDS contacts) and τDS | As below |
| **DR** |  | rate at which non-infectious individuals are infected with the DR strain per year | | [kDR/( kDS+ kDR)]* 1~DS)(~DR)] | | Function of kDR (number of IDR contacts) and τDR | As below |
|  | **τDS** | Transmission probability per IDS contact per month | 0.12 | |  | | Fit to epidemic |
|  | **τDR** | Transmission probability per IDR contact per month | τDR = τDS*f | |  | |  |
|  | **f** | Relative fitness of DR strain compared to DS strain | 0.8 | | Affects both infectivity & transmissibility | | 2-6 |
| **Disease progression** | | | | | | | |
| **DS** |  | Rate of progression to DS disease per year | Equal to p1, p2, or p3  (see Figure S2) | | Value depends on the time since infection or re-infection | | As below |
| **DR** |  | DR progression rate per year | Equal to p1*f, p2*f, or p3*f  (see Figure S2) | | Value depends on the time since infection or re-infection | | As below |
|  | **p1** | primary DS progression rate (per year) of EDS or EM individual progressing to IDS | 0.03 | | Rate applies for the first 5 years after first infection event | | 7 |
| **Table S1 continued** | | | | | | | |
|  | **p2** | endogenous DS progression rate (per year) of EDS or EM individual progressing to IDS | 0.0003 | | Rate applies for the the period after 5 years from an infection or re-infection event | | 7 |
|  | **p3** | exogenous reinfection DS progression rate (per year) of EDS or EM individual progressing to IDS | Equal to p1*z | | Rate applies for the first 5 years after a re-infection event | | As below |
|  | **z** | partial immunity | 0.4 | | Decreases progression after a re-infection event | | 7,8 |
| **Recovery and treatment** | | | | | | | |
| **DS** |  | DS recovery rate per year | | 0.85 treated, 0.2 untreated | | Probability of IDS individual recovering to EDS | As below |
| **DR** |  | DR average recovery rate per year | 0.3 treated, 0.2 untreated | | | Probability of IDR individual recovering to EDR | As below |
|  | **rSDS** | DS self-recovery rate per year | 0.2 | |  | | 9,10 |
|  | **rSDR** | DR self-recovery rate per year | 0.2 | | Assumed to be similar to self-recovery for IDR | | 9,10 |
|  | **fT** | fraction of incident TB cases on therapy | 0.5 | | Model assumption | |  |
| **α** |  | rate of acquiring drug-resistance for IDS individual who is receiving treatment, per month | 0.074 | | Applies only to treatment failures who remain alive | | Fit to epidemic |

†these values represent conditional probabilities; the order in which probabilities were considered are shown visually in the probability trees (Supplementary Figure 1) and described in the supplementary text.
